# Supplementary material for: Complex community of nitrite-dependent anaerobic methane oxidation bacteria in coastal sediments of the Mai Po wetland by PCR amplification of both 16S rRNA and pmoA genes
Source: Springer Nature journal article supplement (doi:10.1007/s00253-014-6051-6), 2014-09-14
Supplement: 253_2014_6051_MOESM1_ESM.pdf [file 253_2014_6051_MOESM1_ESM.pdf]

## **Supplementary materials**

Applied Microbiology and Biotechnology

# **Unique Phlotypes of Nitrite-dependent Anaerobic Methane Oxidation Bacteria in Coastal Sediments of the Mai Po Wetland by PCR Amplification of 16S rRNA and *pmoA* genes**

Jing Chen, Zhi-Chao Zhou, Ji-Dong Gu \*

Laboratory of Environmental Microbiology and Toxicology, School of Biological Sciences, Faculty of Science, The University of Hong Kong, Pokfulam Road, Hong Kong SAR, P.R. China

\*Corresponding author

Mailing address: School of Biological Sciences, Faculty of Science, The University of Hong Kong, Pokfulam Road, Hong Kong SAR, P.R. China

Tel: 852-2299-0605; Fax: 852-2559-9114; E-mail: [jdgu@hku.hk](mailto:jdgu@hku.hk)

**Table S1** Summary and analysis of n-damo bacteria from different habitats based on *pmoA* gene sequences\*

| Source/Environment   | N-damo related clone | OTU | Shannon -Wiener | Chao1   | Type | Accession number in GenBank                                             | Reference**                 |
|----------------------|----------------------|-----|-----------------|---------|------|-------------------------------------------------------------------------|-----------------------------|
| CF5S                 | 21                   | 2   | 0.6365          | 1       | M/R  | KJ023443, KJ023450                                                      | Chen et al. (2014b)         |
| CF5B                 | 4                    | 1   | 0               | 1       | M/R  | KJ023444                                                                | Chen et al. (2014b)         |
| E201S                | 8                    | 2   | 0.3768          | 1       | M/R  | KJ023445-KJ023446                                                       | Chen et al. (2014b)         |
| E407S                | 6                    | 2   | 0.4506          | 1       | M/R  | KJ023447-KJ023449                                                       | Chen et al. (2014b)         |
| E407B                | 24                   | 2   | 0.3768          | 1       | M/R  | KJ023451, KJ023455                                                      | Chen et al. (2014b)         |
| E510S                | 16                   | 2   | 0.2338          | 1       | M/R  | KJ023452, KJ023456                                                      | Chen et al. (2014b)         |
| E525S                | 24                   | 1   | 0               | 1       | M/R  | KJ023453                                                                | Chen et al. (2014b)         |
| E525B                | 1                    | 1   | --              | --      | M/R  | KJ023454                                                                | Chen et al. (2014b)         |
| SCS E704S            | 24                   | 3   | 1.0055          | 1       | M    | KF528962-KF528968<br>KF528973-KF528984<br>KF742451-KF742455<br>KF528961 | Chen et al. (2014a)         |
| SCS E401             | 13                   | 3   | 0.9110          | 1       | M    | KF528969-KF528972<br>KF742444-KF742450                                  | Chen et al. (2014a)         |
| Lake Constance       | 15                   | 6   | 1.4878          | 10.5    | F    | HQ906565-HQ906579                                                       | Deutzmann and Schink (2011) |
| Lake Biwa            | 21                   | 1   | 0               | 1       | F    | AB661605-AB661625                                                       | Kojima et al. (2012)        |
| Reed bed             | 12                   | 1   | 0               | 1       | F    | JX898463-JX898474                                                       | Han and Gu (2013)           |
| Reservoir            | 9                    | 7   | 1.8892          | 13.2500 | F    | JX898486-JX898494                                                       | Han and Gu (2013)           |
| WWTP^                | 10                   | 7   | 1.8344          | 19.5    | E    | JX898495-JX898504                                                       | Han and Gu (2013)           |
| Paddy soil           | 11                   | 2   | 0.3046          | 1       | F    | JX898475-JX898485                                                       | Han and Gu (2013)           |
| Paddy soil           | 14                   | 1   | 0               | 1       | F    | JN704402-JN704415                                                       | Wang et al. (2012)          |
| Paddy field          | 20                   | 2   | 0.1985          | 1       | F    | KC341611-KC341630                                                       | Zhu et al. (2013a)          |
| Jingshan paddy field | 27                   | 1   | 0               | 1       | F    | KC905857-KC905883                                                       | Hu et al. (2014)            |

|                                                                        |    |   |        |         |     |                   |                    |
|------------------------------------------------------------------------|----|---|--------|---------|-----|-------------------|--------------------|
| Xixi wetland                                                           | 21 | 3 | 0.3805 | 1       | F   | KC905884-KC905904 | Hu et al. (2014)   |
| XZ wetland                                                             | 4  | 1 | 0      | 1       | F   | KC905905-KC905908 | Hu et al. (2014)   |
| FreshwaterWetlands<br>(Jingshan Paddy;<br>Xixi wetland;<br>XZ wetland) | 52 | 5 | 1.0575 | 1       | F   | KC905857-KC905908 | Hu et al. (2014)   |
| Baiyangdian Lake                                                       | 24 | 1 | 0      | 1       | F   | KC341248-KC341271 | Zhu et al. (2013a) |
| Bosten Lake                                                            | 16 | 2 | 0.4826 | 1       | F   | KC341301-KC341316 | Zhu et al. (2013a) |
| Chaohu Lake                                                            | 19 | 6 | 1.1513 | 1       | F   | KC341317-KC341335 | Zhu et al. (2013a) |
| Dongting Lake                                                          | 21 | 2 | 0.6920 | 1       | F   | KC341336-KC341356 | Zhu et al. (2013a) |
| Jiaxing Constructed<br>wetland-winter                                  | 13 | 8 | 1.8393 | 26      | F   | KC341375-KC341387 | Zhu et al. (2013a) |
| Jiaxing Constructed<br>wetland-summer                                  | 11 | 8 | 2.0198 | 12.1667 | F   | KC341388-KC341398 | Zhu et al. (2013a) |
| Subsurface North<br>canal                                              | 18 | 2 | 0.6870 | 1       | U   | KC341272-KC341289 | Zhu et al. (2013a) |
| North canal-12 m                                                       | 3  | 1 | 0      | 1       | U   | KC341298-KC341300 | Zhu et al. (2013a) |
| North canal-15 m                                                       | 8  | 1 | 0      | 1       | U   | KC341290-KC341297 | Zhu et al. (2013a) |
| Panjin swamp                                                           | 21 | 1 | 0      | 1       | F   | KC341437-KC341457 | Zhu et al. (2013a) |
| Peat land China                                                        | 23 | 6 | 1.3944 | 8       | F   | KC341414-KC341436 | Zhu et al. (2013a) |
| Poyang Lake                                                            | 21 | 2 | 0.5983 | 1       | F   | KC341458-KC341478 | Zhu et al. (2013a) |
| Shahe River                                                            | 18 | 5 | 1.2094 | 1       | F   | KC341479-KC341496 | Zhu et al. (2013a) |
| Songhuajiang River                                                     | 18 | 7 | 1.6715 | 9.25    | F   | KC341497-KC341514 | Zhu et al. (2013a) |
| Tarim River                                                            | 19 | 2 | 0.6918 | 1       | F   | KC341515-KC341533 | Zhu et al. (2013a) |
| Tiaoxi River                                                           | 20 | 3 | 0.9973 | 1       | F   | KC341534-KC341553 | Zhu et al. (2013a) |
| Tibetan Lake                                                           | 10 | 1 | 0      | 1       | S/R | JQ429431-JQ429432 | Yang et al. (2012) |
| Tulufan River                                                          | 18 | 3 | 0.8487 | 3       | F   | KC341357-KC341374 | Zhu et al. (2013a) |
| Wuliangshuhai Lake                                                     | 24 | 4 | 0.9366 | 4.5     | F   | KC341554-KC341577 | Zhu et al. (2013a) |

|                                                                                                                           |     |    |        |         |     |                   |                        |
|---------------------------------------------------------------------------------------------------------------------------|-----|----|--------|---------|-----|-------------------|------------------------|
| Yellow River                                                                                                              | 15  | 1  | 0      | 1       | F   | KC341399-KC341413 | Zhu et al. (2013a)     |
| Yuanmingyuan Lake                                                                                                         | 12  | 3  | 0.7215 | 3.5     | F   | KC341698-KC341709 | Zhu et al. (2013a)     |
| Pearl River-winter                                                                                                        | 20  | 5  | 1.0098 | 6       | F   | KC341578-KC341597 | Zhu et al. (2013a)     |
| Pearl River-summer                                                                                                        | 13  | 2  | 0.6172 | 1       | F   | KC341598-KC341610 | Zhu et al. (2013a)     |
| Donghu Lake                                                                                                               | 15  | 3  | 0.8033 | 1       | F   | KC341631-KC341645 | Zhu et al. (2013a)     |
| Honghaitan Tidal Land                                                                                                     | 17  | 4  | 1.1151 | 4.5     | C   | KC341646-KC341662 | Zhu et al. (2013a)     |
| Shangqiu Reservoir                                                                                                        | 17  | 7  | 1.6100 | 8.5     | F   | KC341663-KC341679 | Zhu et al. (2013a)     |
| Tianchi Lake                                                                                                              | 18  | 9  | 1.8121 | 18      | F   | KC341680-KC341697 | Zhu et al. (2013a)     |
| WWTP <sup>^</sup>                                                                                                         | 128 | 3  | 0.8487 | 1       | U   | KC700842-KC700715 | Gao et al. (2013)      |
| Soils <sup>^</sup>                                                                                                        | 40  | 3  | 0.3813 | 1       | U   | KC700675-KC700714 | Gao et al. (2013)      |
| Qiantang River                                                                                                            | 50  | 16 | 2.1437 | 29.5    | F   | KC503613-KC503662 | Li-Dong et al. (2014a) |
| West Lake                                                                                                                 | 24  | 8  | 1.5359 | 12      | F   | JX531974-JX531997 | Zhu et al. (2013b)     |
| Jiaojiang estuary                                                                                                         | 80  | 20 | 2.3787 | 30.1250 | C   | KC512302-KC512381 | Li-Dong et al. (2014b) |
| Freshwater habitats<br>(Alpine peat bog<br>WWTPs <sup>^</sup><br>Drainage ditch<br>Contaminated<br>aquifer <sup>^</sup> ) | 12  | 9  | NA     | NA      | F/R | HQ698926-HQ698937 | Luesken et al. (2011c) |
| WWTPs <sup>^</sup>                                                                                                        | 19  | 10 | NA     | NA      | F/R | JF706214-JF706196 | Luesken et al. (2011b) |
| SBR co-enrichment<br>with anammox <sup>^</sup>                                                                            | 7   | 3  | NA     | NA      | E/R | JN006731-JN006737 | Luesken et al. (2011a) |
| Sewage treatment<br>plants <sup>^</sup>                                                                                   | 12  | 8  | NA     | NA      | E/R | KC112371-KC112382 | Ho et al. (2013)       |
| Minerotrophic<br>peatland <sup>^</sup>                                                                                    | 3   | 3  | NA     | NA      | E/R | JX262153-JX262155 | Zhu et al. (2012)      |
| Lab scale reactor <sup>^</sup>                                                                                            | 13  | 3  | 1.0579 | 1       | E/? | AB767281-AB767293 | Masashi et al. (2013)  |

\*based on percentage sequence identity of 95% of *pmoA* gene-based PCR amplification and analysis using Fastgroup (Yu et al. 2006);

Abbreviations: NA, not applicable; M, marine; F, freshwater; S, saline lake; C, costal; U, unknown; E, enrichment; R, representative sequences available in the GenBank database only;

\*\*Unpublished reference indicates that the related DNA sequences have already been released in the database without a published journal paper until 17-April-2014 when the information was accessed;

^Isolation sources/environments are not sediments.

**Table S2** Statistical analyses of physicochemical parameters and n-damo bacteria diversity\*

| Parameter                                                                                   | OTU           |             | Shannon-Wiener |             | Chao1         |             | Abundance |
|---------------------------------------------------------------------------------------------|---------------|-------------|----------------|-------------|---------------|-------------|-----------|
|                                                                                             | 16S<br>rRNA   | <i>pmoA</i> | 16S<br>rRNA    | <i>pmoA</i> | 16S<br>rRNA   | <i>pmoA</i> |           |
| Depth                                                                                       | 0.6642        | 0.1111      | 0.8714         | 0.0401      | 0.4946        | -0.0546     | 0.2918    |
| pH                                                                                          | 0.3893        | -0.0906     | 0.4429         | 0.2817      | 0.4327        | -0.3926     | 0.8428    |
| Redox                                                                                       | -0.4577       | -0.4001     | -0.4725        | -0.7031     | -0.4115       | -0.0002     | -0.5632   |
| Temperature                                                                                 | -0.6597       | 0.0648      | -0.7509        | 0.4254      | -0.5595       | 0.2391      | 0.3246    |
| Salinity                                                                                    | -0.5406       | 0.1490      | -0.3528        | -0.1283     | -0.7425       | 0.7672      | -0.4087   |
| NH <sub>4</sub> <sup>+</sup>                                                                | <b>0.9299</b> | 0.1092      | 0.7962         | 0.0988      | <b>0.9974</b> | -0.6086     | 0.0116    |
| NO <sub>2</sub> <sup>-</sup>                                                                | 0.8718        | 0.2132      | 0.6714         | 0.1132      | <b>0.9473</b> | -0.5184     | -0.2747   |
| NO <sub>3</sub> <sup>-</sup>                                                                | -0.1376       | 0.0803      | -0.4558        | 0.2308      | 0.0793        | -0.2384     | -0.2158   |
| NH <sub>4</sub> <sup>+</sup> /(NO <sub>3</sub> <sup>-</sup> +NO <sub>2</sub> <sup>-</sup> ) | 0.8169        | -0.2087     | 0.7809         | -0.1245     | <b>0.9018</b> | -0.7598     | 0.3587    |

\*Pearson's r is given by

$$r = \frac{\sum_i (x_i - \bar{x})(y_i - \bar{y})}{\sqrt{\sum_i (x_i - \bar{x})^2} \sqrt{\sum_i (y_i - \bar{y})^2}};$$

Numbers in bold are regarded as significant ( $P < 0.05$ ). The significance is computed using a two-tailed t test with  $n-2$  degrees of freedom and

$$t = r \sqrt{\frac{n-2}{1-r^2}}.$$

16S rRNA gene abundance was positively correlated with depth, pH, temperature, NH<sub>4</sub><sup>+</sup> and NH<sub>4</sub><sup>+</sup>/Σ(NO<sub>3</sub><sup>-</sup>+NO<sub>2</sub><sup>-</sup>). In addition, depth, NO<sub>2</sub><sup>-</sup> and NH<sub>4</sub><sup>+</sup> positively correlated with both 16S rRNA and *pmoA* OTUs and diversity, while redox negatively correlated with all OTU, diversity, richness and abundance indexes.

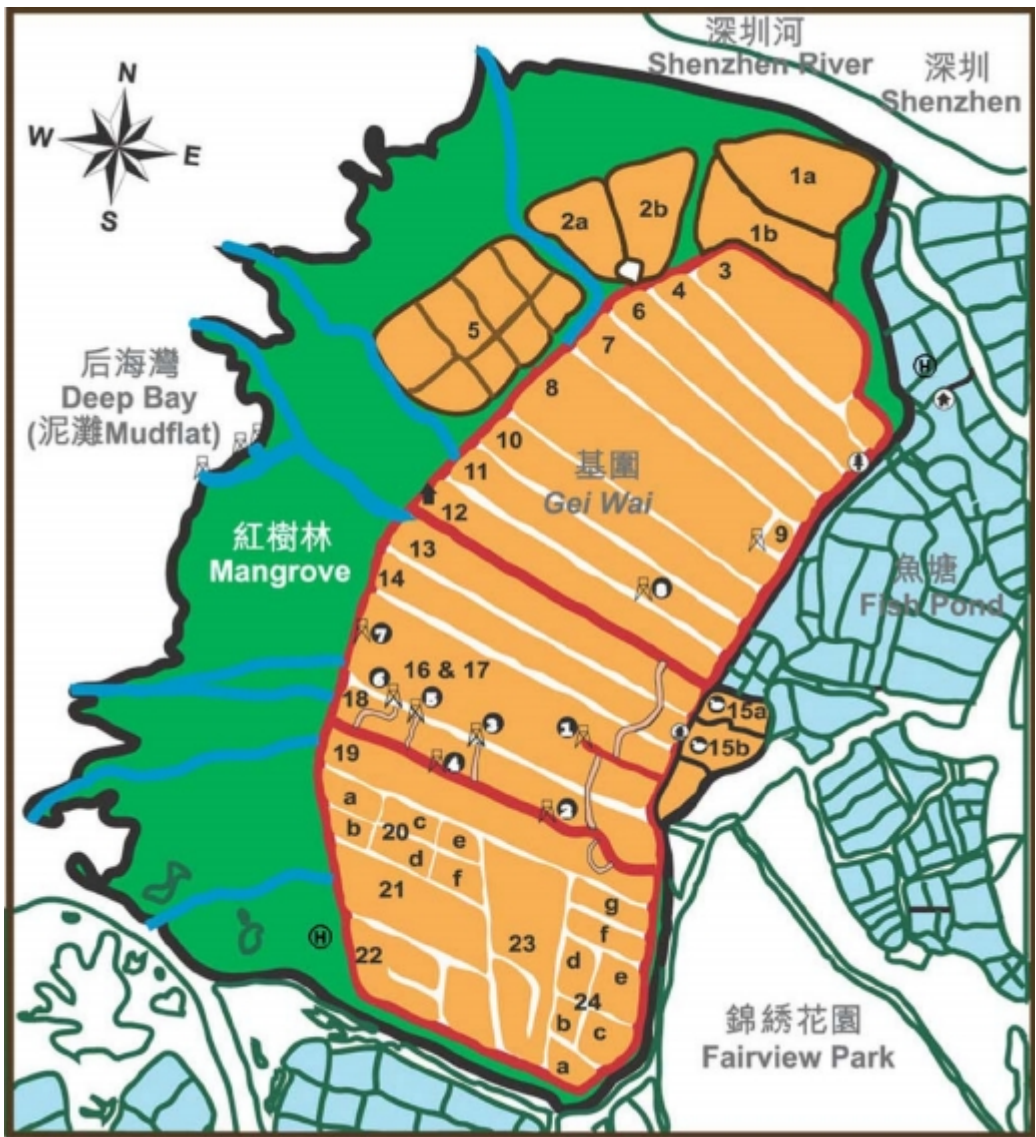

Fig. S1 Map of Mai Po Nature Reserve (Adapted from WWF\_HongKong (2006))

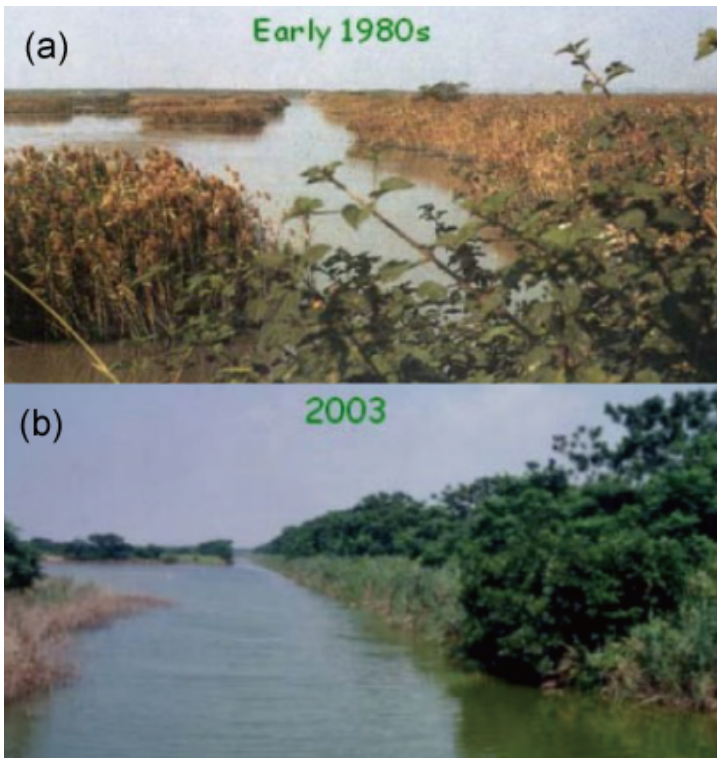

**Fig. S2** The reed bed in Mai Po Nature Reserve in the 1980s (a) and 2003 (b) (Adapted from WWF\_HongKong (2006)).



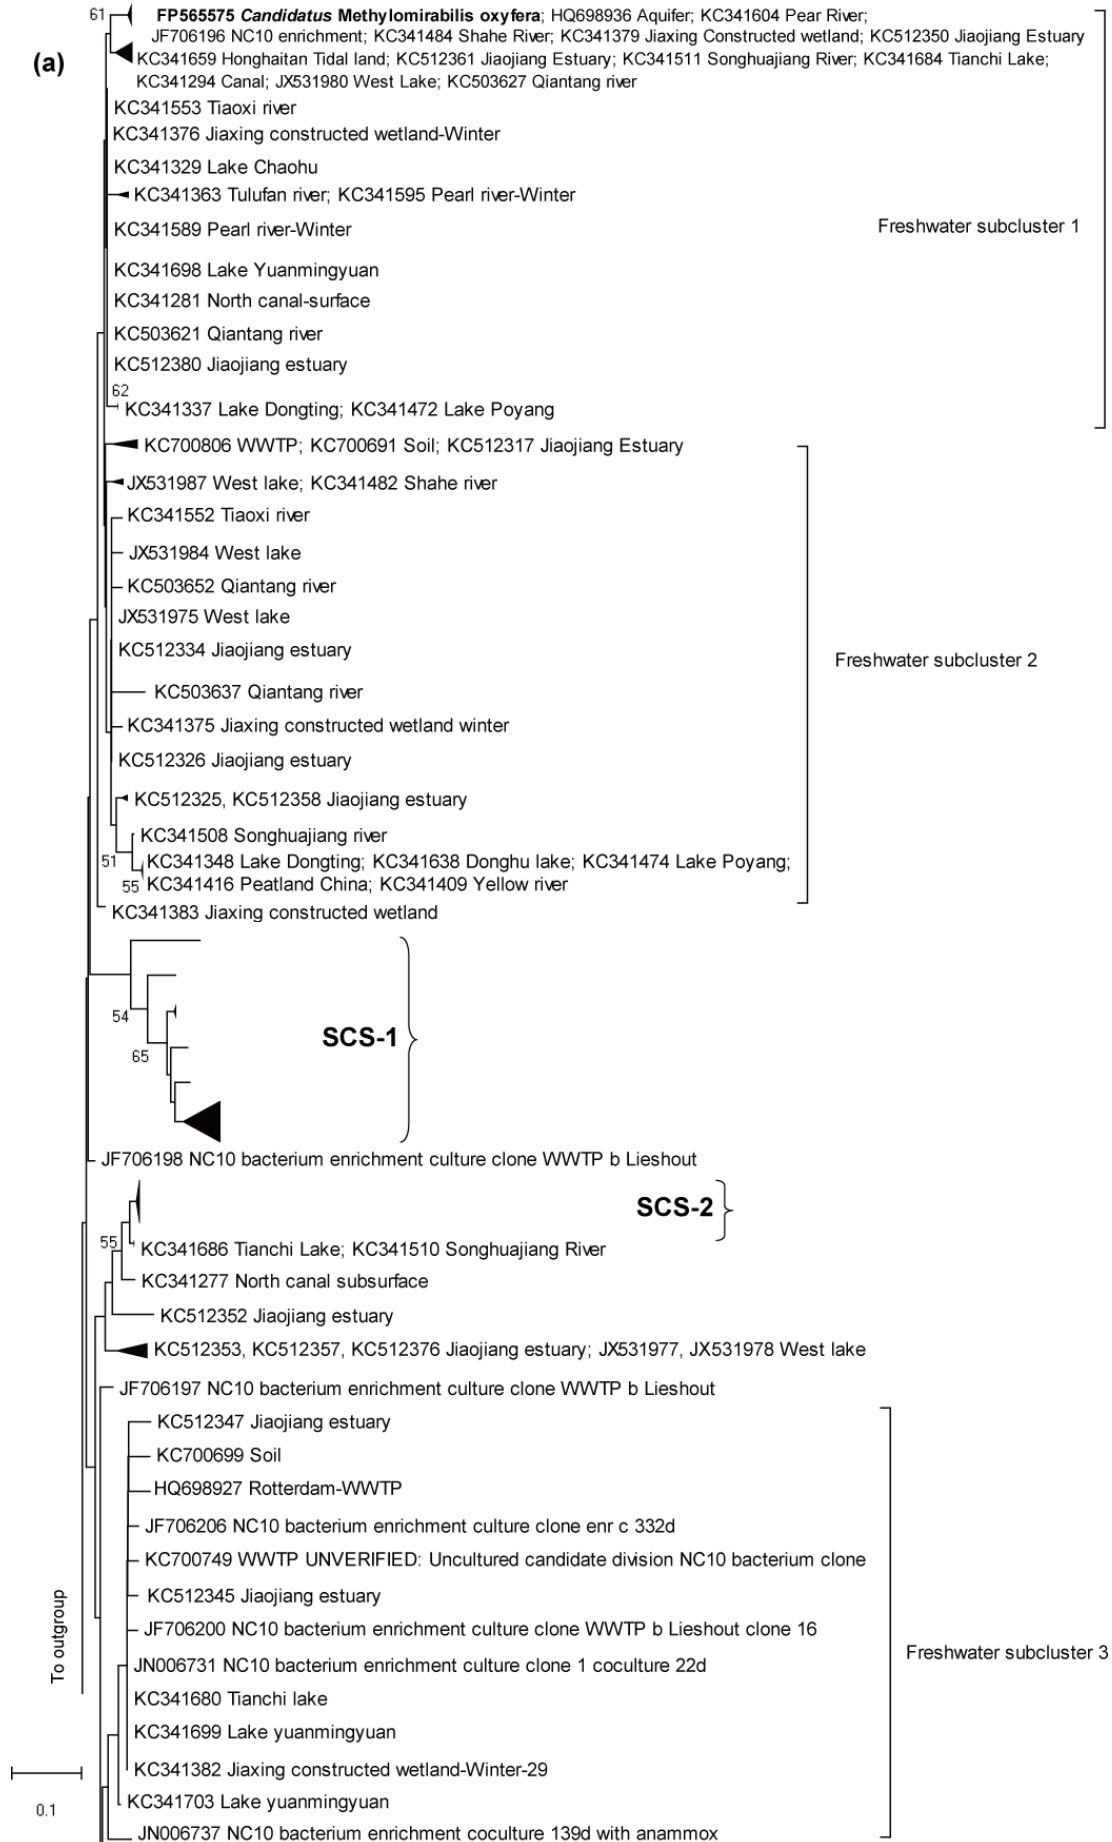

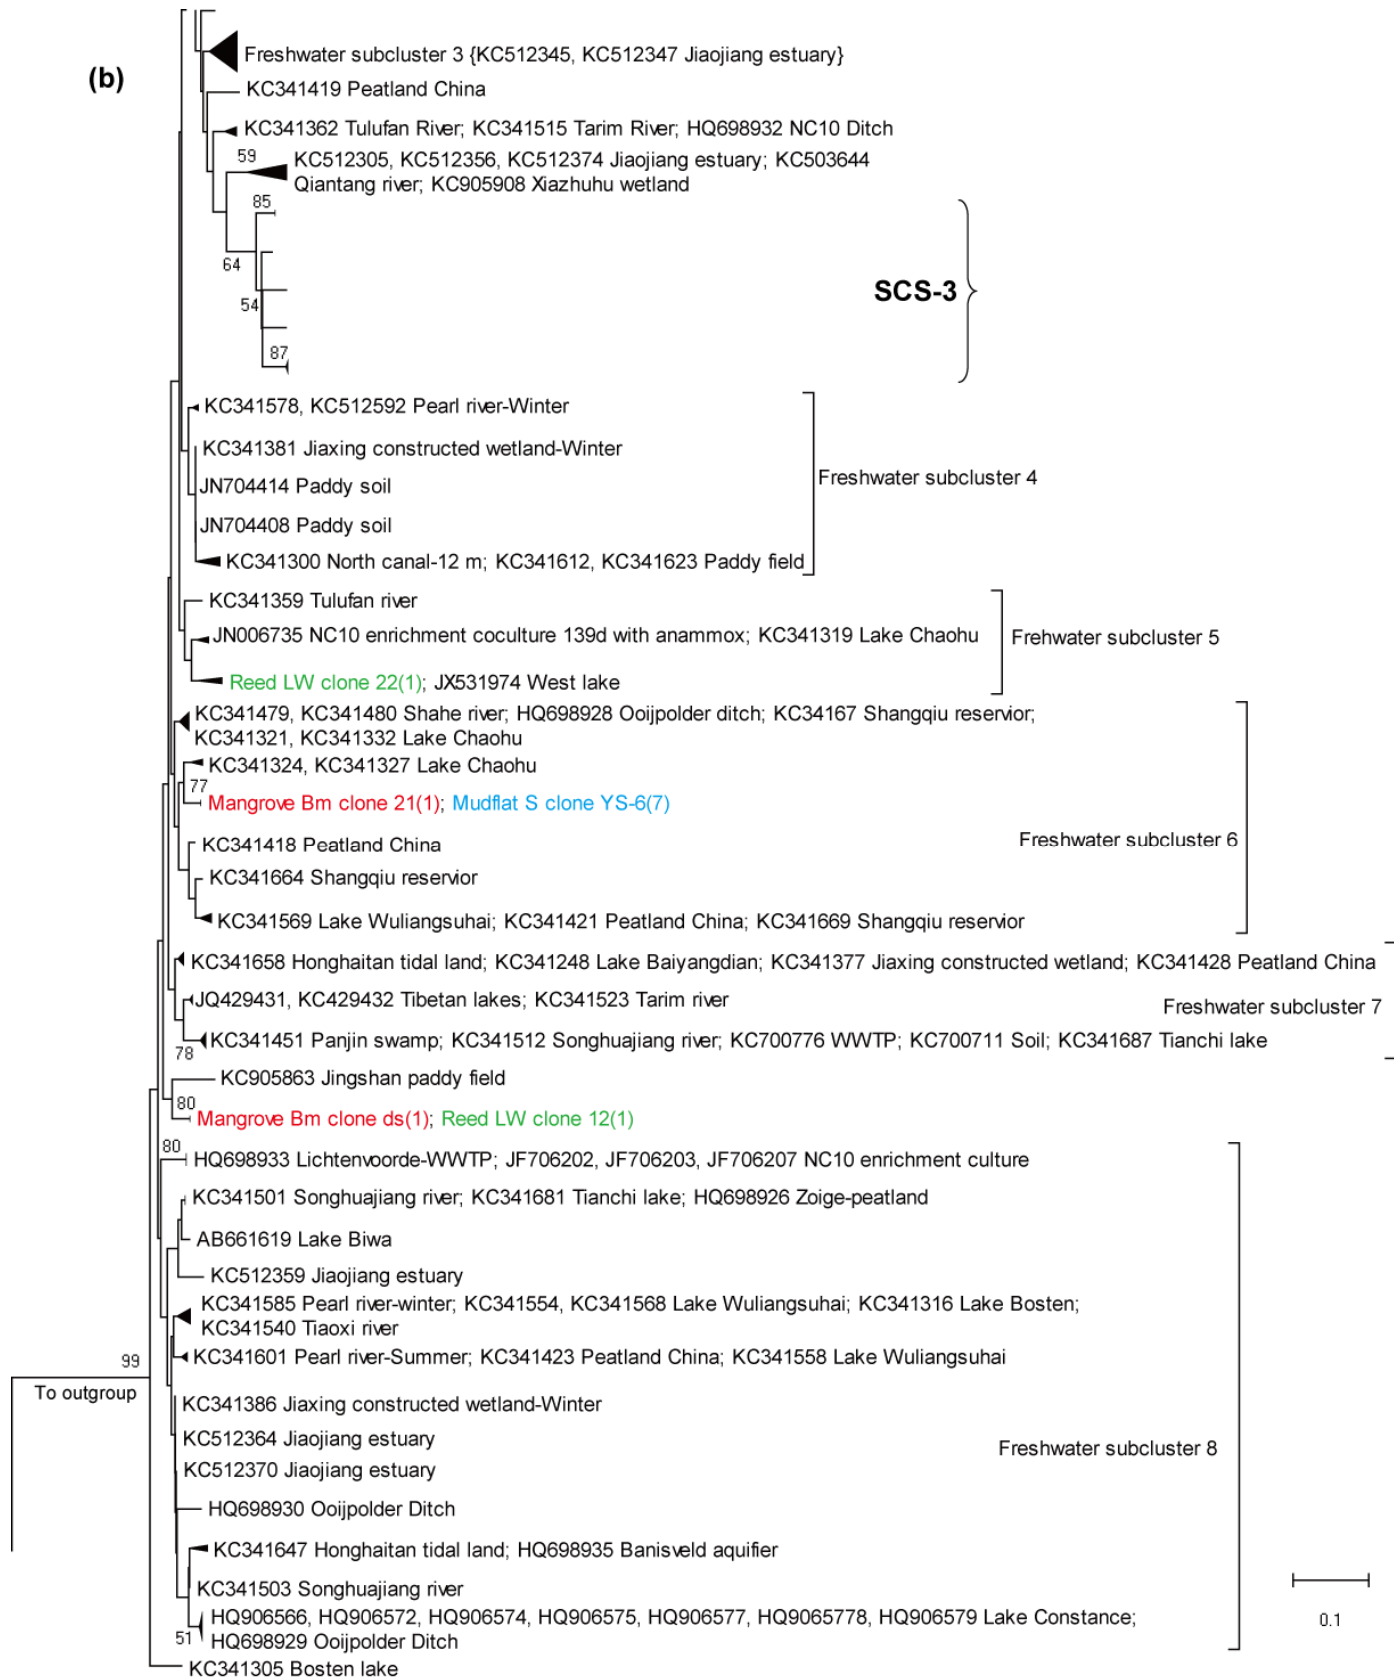

**Fig. S3** Consensus phylogenetic tree subclusters 1-3(a) and 4-8(b) conducted after subjecting deduced *pmoA* amino acid sequences to neighbor joining analysis. The topology in this figure is strictly the same with that in Figure 2b. OTUs were defined with a Percent

Sequence Identity of 95% (*pmoA* gene) similarity by Fastgroup II. Sequences in the present work were marked in red, blue and green for those from mangrove, mudflat and reed sediments, respectively. Numbers in parenthesis refer to how many detected sequences fell in the branch or subcluster. Numbers at the nodes represent the levels of bootstrap support based on 1000 re-sampled data sets (only >50% values are shown).

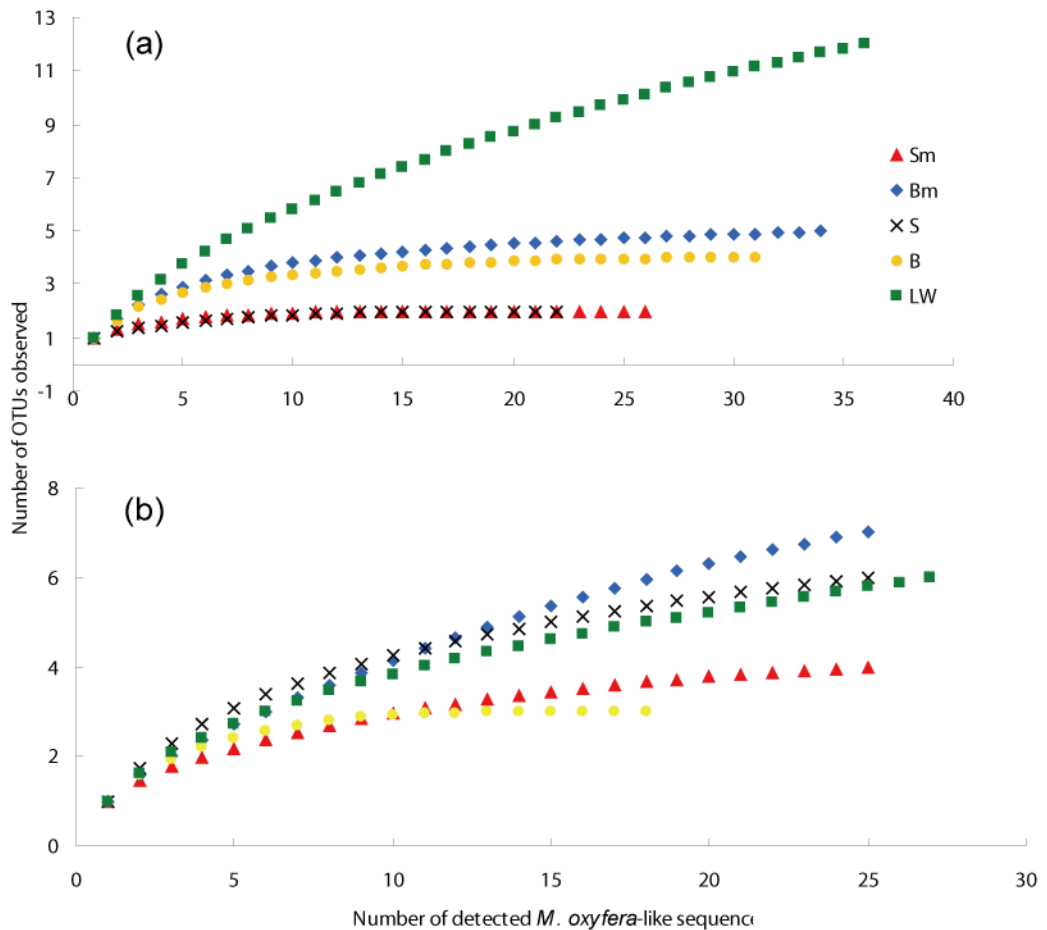

**Fig. S4** Rarefaction analyses of n-damo bacteria communities based on amplified 16S rRNA (a) and *pmoA* (b) gene sequences in Mai Po sediments. Fastgroup II was used with 3% or 5% nucleotide sequence variation for OTU determination for 16S rRNA or *pmoA* gene, respectively.

## References

- Chen J, Jiang XW, Gu J-D (2014a) Existence of Novel Phylotypes of Nitrite-dependent Anaerobic Methane-oxidizing Bacteria in Surface and Subsurface Sediments of the South China Sea. *Geomicrobiol J*. doi: 10.1080/01490451.01492014.01917742
- Chen J, Zhou ZC, Gu J-D (2014b) Occurrence and Diversity of Nitrite-dependent Anaerobic Methane Oxidation Bacteria in the Sediments of the South China Sea Revealed by Amplification of both 16S rRNA and *pmoA* Genes. *Appl Microbiol Biotechnol* 98: 5685-5696
- Deutzmann JS, Schink B (2011) Anaerobic Oxidation of Methane in Sediments of Lake Constance, an Oligotrophic Freshwater Lake. *Appl Environ Microbiol* 77: 4429-4436
- Gao J, Luo X, Wu G, Peng Y (2013) Occurrence of nitrite-dependent anaerobic methane oxidizing bacteria from different soil and wastewater sludge. NCBI Genbank web <http://www.ncbi.nlm.nih.gov/nuccore/> Accessed 17 April 2014
- Han P, Gu J-D (2013) A newly designed degenerate PCR primer based on *pmoA* gene for detection of nitrite-dependent anaerobic methane-oxidizing bacteria from different ecological niches. *Appl Microbiol Biotechnol* 97: 10155-10162
- Ho A, Vlaeminck SE, Ettwig KF, Schneider B, Frenzel P, Boon N (2013) Revisiting methanotrophic communities in sewage treatment plants. *Appl Environ Microbiol* 79: 2841-2846
- Hu BL, Shen LD, Lian X, Zhu Q, Liu S, Huang Q, He ZF, Geng S, Cheng DQ, Lou LP, Xu XY, Zheng P, He YF (2014) Evidence for nitrite-dependent anaerobic methane oxidation as a previously overlooked microbial methane sink in wetlands. *Proc Natl Acad Sci U S A* 111: 4495-4500
- Kojima H, Tsutsumi M, Ishikawa K, Iwata T, Musmann M, Fukui M (2012) Distribution of putative denitrifying methane oxidizing bacteria in sediment of a freshwater lake, Lake Biwa. *Syst Appl Microbiol* 35: 233-238
- Li-Dong S, Qun Z, Shuai L, Ping D, Jiang-Ning Z, Dong-Qing C, Xiang-Yang X, Ping Z, Bao-Lan H (2014a) Molecular evidence for nitrite-dependent anaerobic methane-oxidising bacteria in the Jiaojiang Estuary of the East Sea (China). *Appl Microbiol Biotechnol*. doi: 10.1007/s00253-00014-05556-00253
- Li-Dong S, Qun Z, Shuai L, Ping D, Jiang-Ning Z, Dong-Qing C, Xiang-Yang X, Ping Z, Bao-Lan H (2014b) Molecular evidence for nitrite-dependent anaerobic methane-oxidising bacteria in the Jiaojiang Estuary of the East Sea (China). *Appl Microbiol Biotechnol*
- Luesken FA, Sanchez J, van Alen TA, Sanabria J, Op den Camp HJM, Jetten MSM, Kartal B (2011a) Simultaneous Nitrite-Dependent Anaerobic Methane and Ammonium Oxidation Processes. *Appl Environ Microbiol* 77: 6802-6807

- Luesken FA, van Alen TA, van der Biezen E, Frijters C, Toonen G, Kampman C, Hendrickx TL, Zeeman G, Temmink H, Strous M, Op den Camp HJ, Jetten MS (2011b) Diversity and enrichment of nitrite-dependent anaerobic methane oxidizing bacteria from wastewater sludge. *Appl Microbiol Biotechnol* 92: 845-854
- Luesken FA, Zhu BL, van Alen TA, Butler MK, Diaz MR, Song B, den Camp HJMO, Jetten MSM, Ettwig KF (2011c) pmoA Primers for Detection of Anaerobic Methanotrophs. *Appl Environ Microbiol* 77: 3877-3880
- Masashi H, Masafumi K, Masato K, Takashi Y (2013) Enrichment of denitrifying anaerobic methane oxidizing microorganisms using nitrate or nitrite as electron acceptor. NCBI Genbank web <http://www.ncbi.nlm.nih.gov/nuccore/> Accessed 17 April 2014
- Wang Y, Zhu G, Harhangi HR, Zhu B, Jetten MS, Yin C, Op den Camp HJ (2012) Co-occurrence and distribution of nitrite-dependent anaerobic ammonium and methane oxidizing bacteria in a paddy soil. *FEMS Microbiol Lett* 336: 79-88
- WWF\_HongKong (2006) Management Plan for the Mai Po Nature Reserve 2006-2010. WWF Hong Kong, Hong Kong
- Yang J, Jiang HC, Wu G, Hou WG, Sun YJ, Lai ZP, Dong HL (2012) Co-occurrence of nitrite-dependent anaerobic methane oxidizing and anaerobic ammonia oxidizing bacteria in two Qinghai-Tibetan saline lakes. *Front Earth Sci* 6: 383-391
- Yu YN, Breitbart M, McNairnie P, Rohwer F (2006) FastGroupII: A web-based bioinformatics platform for analyses of large 16S rDNA libraries. *Bmc Bioinformatics* 7: 57
- Zhu BL, van Dijk G, Fritz C, Smolders AJP, Pol A, Jetten MSM, Ettwig KF (2012) Anaerobic Oxidation of Methane in a Minerotrophic Peatland: Enrichment of Nitrite-Dependent Methane-Oxidizing Bacteria. *Appl Environ Microbiol* 78: 8657-8665
- Zhu GB, Zhou LL, Jiang B, Wang Y, Wang SY, Jetten MSM, Yin CQ (2013a) Biogeographical distribution of nitrite dependent anaerobic methanotrophic bacteria in wetland ecosystems: from regional scale to global scale. NCBI Genbank web <http://www.ncbi.nlm.nih.gov/nuccore/> Accessed 17 April 2014
- Zhu Q, Shen LD, Hu BL, Lou LP, Cheng DQ (2013b) Molecular detection of denitrifying anaerobic oxidizing bacteria in the sediment of West Lake, Hangzhou. *Acta Scientiae Circumstantiae* 33: 1321-1325
